# Supplementary material
Source: MDPI journal article supplement (https://www.mdpi.com/2073-4433/8/9/179)
Supplement: s1 [file s1]

# Multi-Year (2013-2016) PM<sub>2.5</sub> Wildfire Pollution Exposure over North America Determined from Operational Air Quality Forecasts

Rodrigo Munoz-Alpizar <sup>1,\*</sup>, Radenko Pavlovic <sup>1</sup>, Michael D. Moran <sup>2</sup>, Jack Chen <sup>2</sup>, Sylvie Gravel <sup>2</sup>, Sarah B. Henderson <sup>3</sup>, Sylvain Ménard <sup>1</sup>, Jacinthe Racine <sup>1</sup>, Annie Duhamel <sup>1</sup>, Samuel Gilbert <sup>1</sup>, Paul-André Beaulieu <sup>1</sup>, Hugo Landry <sup>1</sup>, Didier Davignon <sup>1</sup>, Sophie Cousineau <sup>1</sup> and Véronique Bouchet <sup>1</sup>

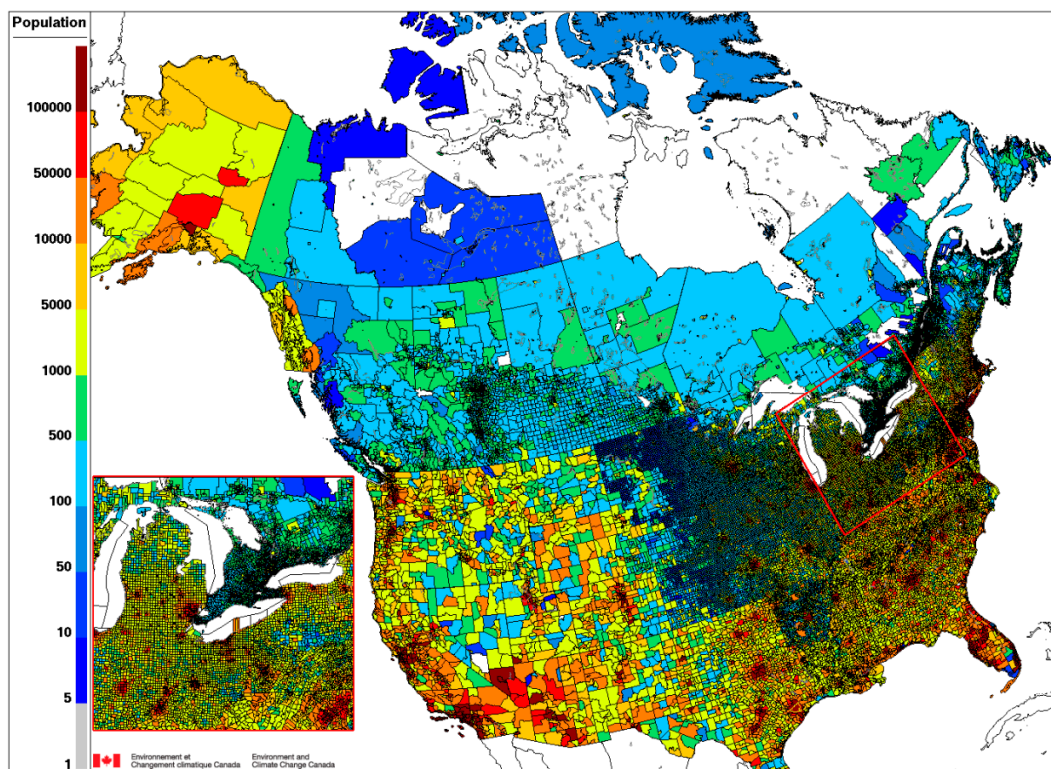

**Figure S1.** North American population count by census reporting geographic unit: dissemination-area level for the 2016 Canada census and census-tract level (sub-county) for the 2010 U.S. census. The red box over the four southern Great Lakes marks the location of the inset.

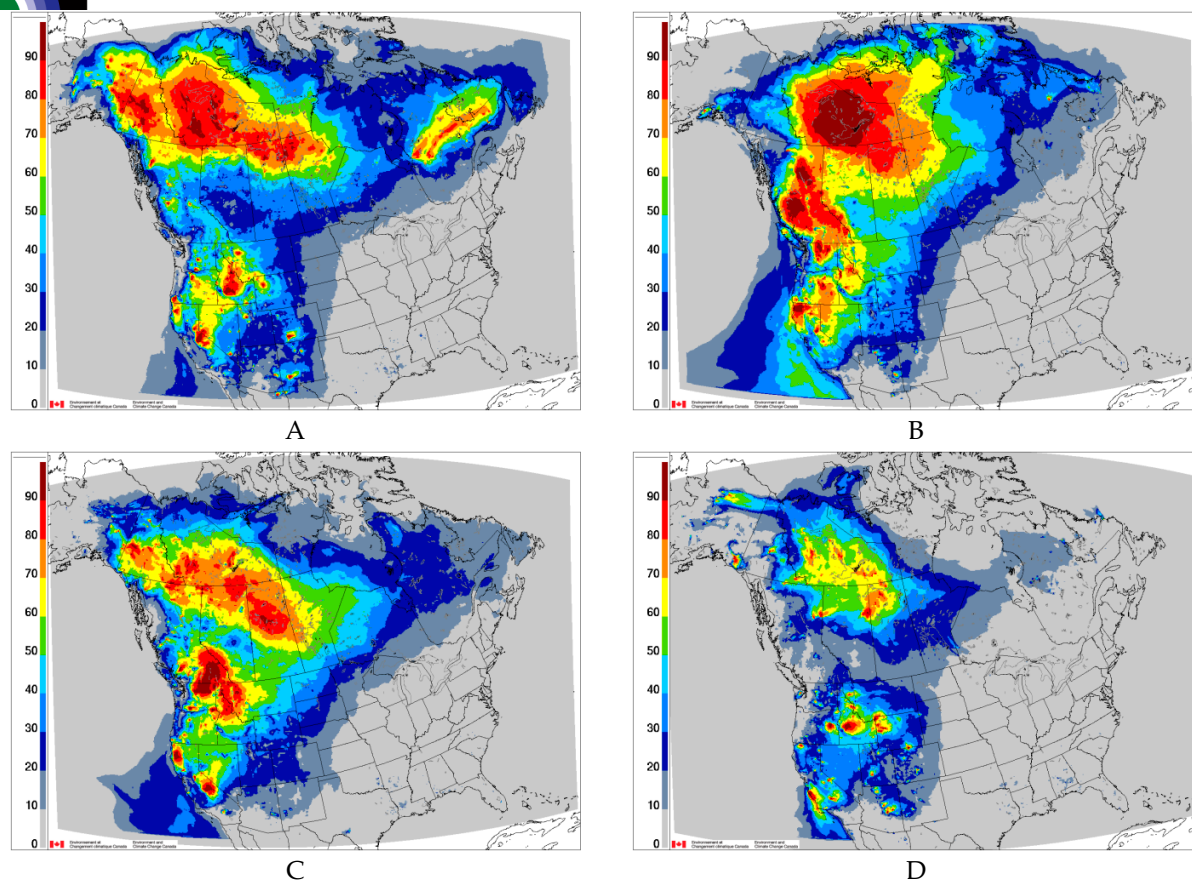

**Figure S2.** Average seasonal (May–Sept.) percentage of fire-PM<sub>25</sub> contribution to average seasonal total PM<sub>25</sub> FireWork concentrations for (A) 2013, (B) 2014, (C) 2015, and (D) 2016.

**Table S1.** FireWork North American seasonal (May–Sept.) biomass-burning emissions (Tg-Species season<sup>-1</sup>) for 2013–2016.

| Year | Higher Alkenes | Higher Alkanes | C <sub>3</sub> H <sub>8</sub> | CO    | C <sub>2</sub> H <sub>4</sub> | NH <sub>3</sub> | NO   | NO <sub>2</sub> | SO <sub>2</sub> | PM <sub>2.5</sub> | TPM  |
|------|----------------|----------------|-------------------------------|-------|-------------------------------|-----------------|------|-----------------|-----------------|-------------------|------|
| 2013 | 0.22           | 0.03           | 0.30                          | 11.58 | 0.66                          | 0.19            | 0.12 | 0.02            | 0.10            | 1.02              | 1.20 |
| 2014 | 0.36           | 0.05           | 0.50                          | 19.38 | 1.10                          | 0.32            | 0.19 | 0.03            | 0.17            | 1.70              | 2.01 |
| 2015 | 0.29           | 0.04           | 0.40                          | 15.16 | 0.86                          | 0.25            | 0.20 | 0.03            | 0.15            | 1.39              | 1.64 |
| 2016 | 0.17           | 0.02           | 0.23                          | 8.85  | 0.50                          | 0.15            | 0.10 | 0.02            | 0.08            | 0.79              | 0.93 |

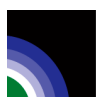

**Table S2.** Mean monthly PM<sub>2.5</sub> concentrations above 30 µg/m<sup>3</sup> for U.S. Air Quality System (AQS) and Canadian National Air Pollution Surveillance (NAPS) AQ measurement stations with completeness ratios above 50%, May–September, 2013–2016, based on reports from the AIRNow and ECCC near-real-time AQ data feeds. The corresponding FireWork and RAQDPS values represent monthly PM<sub>2.5</sub> concentrations forecast at those station locations by the two AQ forecast systems with and without wildfire emissions, respectively. Note that the differences between these pairs of values represent the fire-PM<sub>2.5</sub> concentration values. ECCC basic quality control system for NRT AQ observations rejects as suspicious, PM<sub>2.5</sub> observations with sudden spikes and/or concentration above 1,000 µg/m<sup>3</sup>. In May 2016 extreme wildfires were very close to a number of AQ stations in northern Alberta and observations above 1000 µg/m<sup>3</sup> were frequently reported from NAPS stations 90701, 90702, 90801 and 90806. For May 2016, we recalculated concentration statistics (number in brackets), taking into account observations above the 1000 µg/m<sup>3</sup> threshold.

| State/Province        | Month  | AQS/NAPS Station ID | Observed Monthly PM <sub>2.5</sub> | Completeness Ratio | FireWork Monthly PM <sub>2.5</sub> | RAQDPS Monthly PM <sub>2.5</sub> |
|-----------------------|--------|---------------------|------------------------------------|--------------------|------------------------------------|----------------------------------|
|                       |        |                     | 2013                               |                    |                                    |                                  |
| Oregon                | August | 410330011           | 34.4                               | 67%                | 10.2                               | 2.4                              |
|                       |        |                     | 2014                               |                    |                                    |                                  |
| Northwest Territories | July   | 129003              | 49.0                               | 90%                | 28.5                               | 1.1                              |
| Northwest Territories | August | 129003              | 34.3                               | 94%                | 31.1                               | 0.8                              |
|                       |        |                     | 2015                               |                    |                                    |                                  |
| Saskatchewan          | July   | 80110               | 31.1                               | 86%                | 9.2                                | 3.9                              |
| British Columbia      | August | 103502              | 38.7                               | 99%                | 37.6                               | 1.6                              |
| British Columbia      | August | 104101              | 39.5                               | 79%                | 128.4                              | 1.5                              |
| Idaho                 | August | 160090010           | 30.2                               | 97%                | 18.7                               | 2.5                              |
| Idaho                 | August | 160490002           | 33.4                               | 91%                | 22.7                               | 2.5                              |
| Idaho                 | August | 160490003           | 49.9                               | 82%                | 44.9                               | 4.5                              |
| Idaho                 | August | 160590004           | 36.3                               | 95%                | 7.9                                | 1.0                              |
| Idaho                 | August | 160690012           | 36.4                               | 92%                | 21.7                               | 4.2                              |
| Idaho                 | August | 160690014           | 34.2                               | 96%                | 22.0                               | 2.7                              |
| Montana               | August | 300530018           | 35.8                               | 86%                | 33.8                               | 2.5                              |
| Oregon                | August | 410290019           | 42.4                               | 90%                | 23.5                               | 1.8                              |
| Oregon                | August | 410290133           | 37.1                               | 97%                | 14.9                               | 4.5                              |
| Washington            | August | 530470009           | 38.6                               | 85%                | 49.6                               | 0.9                              |
| Washington            | August | 530470010           | 31.7                               | 85%                | 25.2                               | 0.8                              |
|                       |        |                     | 2016                               |                    |                                    |                                  |
| Alberta               | May    | 90701               | 29.7 (186.1)                       | 79% (100%)         | 51.6                               | 2.3                              |
| Alberta               | May    | 90702               | 30.1 (162.6)                       | 30% (99%)          | 57.5                               | 2.3                              |
| Alberta               | May    | 90801               | 15.4 (61.9)                        | 95% (100%)         | 10.8                               | 2.5                              |
| Alberta               | May    | 90806               | 13.9 (62.0)                        | 95% (100%)         | 10.8                               | 2.5                              |

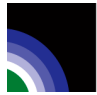

**Table S3.** Population in Canada (as number and percentage of people) affected by wildfire pollution above five PM<sub>2.5</sub> concentration thresholds based on the average monthly fire-PM<sub>2.5</sub> contribution to total surface PM<sub>2.5</sub> concentrations and average seasonal fire-PM<sub>2.5</sub> contribution to total surface PM<sub>2.5</sub> concentration. The affected population is based on the 2016 Canadian census.

| µg/m³                             | >0.2       |         | >1         |         | >5        |         | >10       |        | >28     |        |
|-----------------------------------|------------|---------|------------|---------|-----------|---------|-----------|--------|---------|--------|
| 2013                              |            |         |            |         |           |         |           |        |         |        |
| May                               | 642,932    | (1.8%)  | 18,326     | (0.1%)  | 0         | (0.0%)  | 0         | (0.0%) | 0       | (0.0%) |
| June                              | 25,703,385 | (73.1%) | 137,098    | (0.4%)  | 13,170    | (0.0%)  | 1,306     | (0.0%) | 2       | (0.0%) |
| July                              | 33,101,990 | (94.2%) | 13,982,625 | (39.8%) | 25,265    | (0.1%)  | 3,051     | (0.0%) | 29      | (0.0%) |
| August                            | 34,686,331 | (98.7%) | 24,566,761 | (69.9%) | 45,658    | (0.1%)  | 7,771     | (0.0%) | 881     | (0.0%) |
| September                         | 14,506,471 | (41.3%) | 3,281,702  | (9.3%)  | 805       | (0.0%)  | 148       | (0.0%) | 26      | (0.0%) |
| 2014                              |            |         |            |         |           |         |           |        |         |        |
| May                               | 789,748    | (2.2%)  | 5689       | (0.0%)  | 0         | (0.0%)  | 0         | (0.0%) | 0       | (0.0%) |
| June                              | 1,226,604  | (3.5%)  | 127,592    | (0.4%)  | 1007      | (0.0%)  | 41        | (0.0%) | 8       | (0.0%) |
| July                              | 34,429,961 | (98.0%) | 7,550,339  | (21.5%) | 534,846   | (1.5%)  | 47,472    | (0.1%) | 3318    | (0.0%) |
| August                            | 32,841,741 | (93.4%) | 11,746,035 | (33.4%) | 5,206,866 | (14.8%) | 867,789   | (2.5%) | 27,160  | (0.1%) |
| September                         | 32,017,304 | (91.1%) | 9,083,676  | (25.8%) | 17,925    | (0.1%)  | 1,104     | (0.0%) | 186     | (0.0%) |
| 2015                              |            |         |            |         |           |         |           |        |         |        |
| May                               | 6,827,721  | (19.4%) | 75,421     | (0.2%)  | 147       | (0.0%)  | 8         | (0.0%) | 0       | (0.0%) |
| June                              | 9,091,940  | (25.9%) | 2,549,094  | (7.3%)  | 84,180    | (0.2%)  | 7592      | (0.0%) | 10      | (0.0%) |
| July                              | 34,584,325 | (98.4%) | 11,000,104 | (31.3%) | 1,306,565 | (3.7%)  | 212,670   | (0.6%) | 11,412  | (0.0%) |
| August                            | 34,008,429 | (96.8%) | 7,524,084  | (21.4%) | 3,693,197 | (10.5%) | 2,718,506 | (7.7%) | 417,171 | (1.2%) |
| September                         | 28,735,636 | (81.8%) | 12,678,392 | (36.1%) | 7884      | (0.0%)  | 1540      | (0.0%) | 0       | (0.0%) |
| 2016                              |            |         |            |         |           |         |           |        |         |        |
| May                               | 5,792,812  | (16.5%) | 1,006,543  | (2.9%)  | 82,734    | (0.2%)  | 75,627    | (0.2%) | 69,909  | (0.2%) |
| June                              | 344,367    | (1.0%)  | 604        | (0.0%)  | 6         | (0.0%)  | 1         | (0.0%) | 0       | (0.0%) |
| July                              | 4,861,438  | (13.8%) | 2,025,218  | (5.8%)  | 531       | (0.0%)  | 13        | (0.0%) | 1       | (0.0%) |
| August                            | 7,612,530  | (21.7%) | 1,465,695  | (4.2%)  | 4         | (0.0%)  | 1         | (0.0%) | 0       | (0.0%) |
| September                         | 4,890,111  | (13.9%) | 27,860     | (0.1%)  | 116       | (0.0%)  | 0         | (0.0%) | 0       | (0.0%) |
| Seasonal Exceedances (Population) |            |         |            |         |           |         |           |        |         |        |
| 2013                              | 34,475,250 | (98.1%) | 851,888    | (2.4%)  | 4058      | (0.0%)  | 620       | (0.0%) | 0       | (0.0%) |
| 2014                              | 32,582,255 | (92.7%) | 9,266,563  | (26.4%) | 166,858   | (0.5%)  | 28,984    | (0.1%) | 272     | (0.0%) |
| 2015                              | 33,609,887 | (95.6%) | 7,216,956  | (20.5%) | 1,330,196 | (3.8%)  | 118,152   | (0.3%) | 5,656   | (0.0%) |
| 2016                              | 6,639,152  | (18.9%) | 150,902    | (0.4%)  | 70,226    | (0.2%)  | 65,458    | (0.2%) | 0       | (0.0%) |



**Table S4.** Population in the U.S. (as number and percentage of people) affected by wildfire pollution above five PM<sub>2.5</sub> concentration thresholds based on the average monthly fire-PM<sub>2.5</sub> contribution to total surface PM<sub>2.5</sub> concentrations and average seasonal fire-PM<sub>2.5</sub> contribution to total surface PM<sub>2.5</sub> concentration. The affected population is based on the 2010 U.S. census.

| $\mu\text{g}/\text{m}^3$          | >0.2        |         | >1         |         | >5         |        | >10       |        | >28     |        |
|-----------------------------------|-------------|---------|------------|---------|------------|--------|-----------|--------|---------|--------|
| 2013                              |             |         |            |         |            |        |           |        |         |        |
| May                               | 6,369,855   | (2.1%)  | 198,586    | (0.1%)  | 4813       | (0.0%) | 326       | (0.0%) | 0       | (0.0%) |
| June                              | 197,044,345 | (64.4%) | 15,192,358 | (5.0%)  | 797,344    | (0.3%) | 248,193   | (0.1%) | 57,186  | (0.0%) |
| July                              | 218,319,685 | (71.4%) | 42,832,356 | (14.0%) | 2,279,485  | (0.7%) | 771,072   | (0.3%) | 29,122  | (0.0%) |
| August                            | 288,283,960 | (94.3%) | 96,744,807 | (31.6%) | 5,243,763  | (1.7%) | 1,914,121 | (0.6%) | 301,617 | (0.1%) |
| September                         | 203,256,658 | (66.5%) | 31,730,054 | (10.4%) | 1,382,830  | (0.5%) | 480,466   | (0.2%) | 62,077  | (0.0%) |
| 2014                              |             |         |            |         |            |        |           |        |         |        |
| May                               | 57,553,087  | (18.8%) | 1,324,240  | (0.4%)  | 28,277     | (0.0%) | 7210      | (0.0%) | 1031    | (0.0%) |
| June                              | 18,276,881  | (6.0%)  | 314,624    | (0.1%)  | 5310       | (0.0%) | 2176      | (0.0%) | 228     | (0.0%) |
| July                              | 201,766,374 | (66.0%) | 14,044,215 | (4.6%)  | 499,710    | (0.2%) | 139,979   | (0.0%) | 36,489  | (0.0%) |
| August                            | 287,394,732 | (94.0%) | 64,578,196 | (21.1%) | 7,836,148  | (2.6%) | 764,217   | (0.2%) | 97,036  | (0.0%) |
| September                         | 252,734,010 | (82.7%) | 60,364,536 | (19.7%) | 16,100,001 | (5.3%) | 2,671,458 | (0.9%) | 248,975 | (0.1%) |
| 2015                              |             |         |            |         |            |        |           |        |         |        |
| May                               | 4,490,883   | (1.5%)  | 74,724     | (0.0%)  | 0          | (0.0%) | 0         | (0.0%) | 0       | (0.0%) |
| June                              | 134,546,945 | (44.0%) | 4,176,000  | (1.4%)  | 459,683    | (0.2%) | 142,071   | (0.0%) | 3540    | (0.0%) |
| July                              | 236,814,300 | (77.5%) | 15,810,821 | (5.2%)  | 77,063     | (0.0%) | 9983      | (0.0%) | 176     | (0.0%) |
| August                            | 269,206,672 | (88.0%) | 61,998,284 | (20.3%) | 6,070,142  | (2.0%) | 2,698,188 | (0.9%) | 277,029 | (0.1%) |
| September                         | 267,691,338 | (87.6%) | 51,286,713 | (16.8%) | 1,722,668  | (0.6%) | 953,907   | (0.3%) | 390,504 | (0.1%) |
| 2016                              |             |         |            |         |            |        |           |        |         |        |
| May                               | 10,427,628  | (3.4%)  | 600,746    | (0.2%)  | 29,852     | (0.0%) | 8457      | (0.0%) | 1221    | (0.0%) |
| June                              | 37,920,470  | (12.4%) | 4,344,490  | (1.4%)  | 150,327    | (0.0%) | 67,638    | (0.0%) | 11,484  | (0.0%) |
| July                              | 55,219,480  | (18.1%) | 35,628,602 | (11.7%) | 4,314,219  | (1.4%) | 1,551,592 | (0.5%) | 291,674 | (0.1%) |
| August                            | 64,447,567  | (21.1%) | 49,600,688 | (16.2%) | 7,332,800  | (2.4%) | 1,042,200 | (0.3%) | 91,643  | (0.0%) |
| September                         | 91,482,431  | (29.9%) | 46,808,579 | (15.3%) | 4,772,423  | (1.6%) | 1,926,979 | (0.6%) | 369,326 | (0.1%) |
| Seasonal Exceedances (Population) |             |         |            |         |            |        |           |        |         |        |
| 2013                              | 268,654,774 | (87.9%) | 24,794,215 | (8.1%)  | 1,197,192  | (0.4%) | 257,899   | (0.1%) | 54,677  | (0.0%) |
| 2014                              | 231,384,067 | (75.7%) | 45,016,698 | (14.7%) | 876,429    | (0.3%) | 179,841   | (0.1%) | 32,549  | (0.0%) |
| 2015                              | 275,424,035 | (90.1%) | 16,234,259 | (5.3%)  | 1,457,392  | (0.5%) | 354,050   | (0.1%) | 56,442  | (0.0%) |
| 2016                              | 63,133,239  | (20.6%) | 37,210,716 | (12.2%) | 2,314,608  | (0.8%) | 339,295   | (0.1%) | 40,703  | (0.0%) |

**Table S5.** Canadian population size in numbers and percentages (rounded to the nearest decimal place) affected by wildfire pollution based on percentage of days with 24-h moving average fire-PM<sub>2.5</sub> above five PM<sub>2.5</sub> concentration thresholds between May-September for four individual years (2013–2016). The affected population is based on the 2016 Canadian census. The lowest percentage used is 1% and the 1-day frequency corresponds to 0.65% in a 5-month period.

| % of days                              | >1 µg/m³   |         | >5 µg/m³   |         | >10 µg/m³  |         | >28 µg/m³  |         |
|----------------------------------------|------------|---------|------------|---------|------------|---------|------------|---------|
| Seasonal Exceedances (population) 2013 |            |         |            |         |            |         |            |         |
| [0–1]                                  | 6,749      | (0.0%)  | 2,106,685  | (6.0%)  | 25,993,759 | (74.0%) | 34,871,358 | (99.2%) |
| [1–10]                                 | 1,234,459  | (3.5%)  | 32,632,296 | (92.8%) | 9,132,418  | (26.0)  | 276,328    | (0.8%)  |
| [10–20]                                | 12,500,102 | (35.6%) | 383,367    | (1.1%)  | 21,564     | (0.1)   | 826        | (0.0%)  |
| [20–30]                                | 16,676,160 | (47.4%) | 25,121     | (0.1%)  | 770        | (0.0)   | 0          | (0.0%)  |
| [30–40]                                | 4,573,235  | (13.0%) | 1,042      | (0.0%)  | 0          | (0.0)   | 0          | (0.0%)  |
| [40–50]                                | 155,087    | (0.4%)  | 0          | (0.0%)  | 0          | (0.0)   | 0          | (0.0%)  |
| [50–60]                                | 2720       | (0.0%)  | 0          | (0.0%)  | 0          | (0.0)   | 0          | (0.0%)  |
| [60–70]                                | 0          | (0.0%)  | 0          | (0.0%)  | 0          | (0.0)   | 0          | (0.0%)  |
| [70–80]                                | 0          | (0.0%)  | 0          | (0.0%)  | 0          | (0.0)   | 0          | (0.0%)  |
| [80–90]                                | 0          | (0.0%)  | 0          | (0.0%)  | 0          | (0.0%)  | 0          | (0.0%)  |
| Seasonal Exceedances (population) 2014 |            |         |            |         |            |         |            |         |
| [0–1]                                  | 36,939     | (0.1%)  | 20,857,052 | (59.3%) | 24,775,798 | (70.5%) | 30,682,463 | (87.3%) |
| [1–10]                                 | 4,795,491  | (13.6%) | 6,011,662  | (17.1%) | 6,189,533  | (17.6%) | 4,390,848  | (12.5%) |
| [10–20]                                | 18,969,140 | (54.0%) | 3,281,520  | (9.3%)  | 4,085,339  | (11.6%) | 71,206     | (0.2%)  |
| [20–30]                                | 3,905,019  | (11.1%) | 4,852,005  | (13.8%) | 69,526     | (0.2%)  | 3828       | (0.0%)  |
| [30–40]                                | 4,203,031  | (12.0%) | 141,643    | (0.4%)  | 28,317     | (0.1%)  | 166        | (0.0%)  |
| [40–50]                                | 3,102,960  | (8.8%)  | 4630       | (0.0%)  | 0          | (0.0%)  | 0          | (0.0%)  |
| [50–60]                                | 132,479    | (0.4%)  | 0          | (0.0%)  | 0          | (0.0%)  | 0          | (0.0%)  |
| [60–70]                                | 3453       | (0.0%)  | 0          | (0.0%)  | 0          | (0.0%)  | 0          | (0.0%)  |
| [70–80]                                | 0          | (0.0%)  | 0          | (0.0%)  | 0          | (0.0%)  | 0          | (0.0%)  |
| [80–90]                                | 0          | (0.0%)  | 0          | (0.0%)  | 0          | (0.0%)  | 0          | (0.0%)  |
| Seasonal Exceedances (population) 2015 |            |         |            |         |            |         |            |         |
| [0–1]                                  | 40,447     | (0.1%)  | 2,002,167  | (5.7%)  | 20,650,180 | (58.8%) | 28,079,097 | (79.9%) |
| [1–10]                                 | 2,714,861  | (7.7%)  | 26,134,354 | (74.4%) | 13,108,503 | (37.3%) | 7,027,047  | (20.0%) |
| [10–20]                                | 20,250,115 | (57.6%) | 6,480,795  | (18.4%) | 1,373,668  | (3.9%)  | 42,368     | (0.1%)  |
| [20–30]                                | 5,250,745  | (14.9%) | 531,195    | (1.5%)  | 16,161     | (0.0%)  | 0          | (0.0%)  |
| [30–40]                                | 5,898,553  | (16.8%) | 0          | (0.0%)  | 0          | (0.0%)  | 0          | (0.0%)  |
| [40–50]                                | 993,791    | (2.8%)  | 0          | (0.0%)  | 0          | (0.0%)  | 0          | (0.0%)  |
| [50–60]                                | 0          | (0.0%)  | 0          | (0.0%)  | 0          | (0.0%)  | 0          | (0.0%)  |
| [60–70]                                | 0          | (0.0%)  | 0          | (0.0%)  | 0          | (0.0%)  | 0          | (0.0%)  |
| [70–80]                                | 0          | (0.0%)  | 0          | (0.0%)  | 0          | (0.0%)  | 0          | (0.0%)  |
| [80–90]                                | 0          | (0.0%)  | 0          | (0.0%)  | 0          | (0.0%)  | 0          | (0.0%)  |
| Seasonal Exceedances (population) 2016 |            |         |            |         |            |         |            |         |
| [0–1]                                  | 18,951,956 | (53.9%) | 28,959,306 | (82.4%) | 32,113,839 | (91.4%) | 34,984,009 | (99.5%) |
| [1–10]                                 | 9,749,579  | (27.7%) | 6,082,138  | (17.3%) | 2,965,671  | (8.4%)  | 97,898     | (0.3%)  |
| [10–20]                                | 4,058,078  | (11.5%) | 108,365    | (0.3%)  | 70,381     | (0.2%)  | 67,985     | (0.2%)  |
| [20–30]                                | 2,207,083  | (6.3%)  | 82         | (0.0%)  | 0          | (0.0%)  | 0          | (0.0%)  |
| [30–40]                                | 104,489    | (0.3%)  | 0          | (0.0%)  | 0          | (0.0%)  | 0          | (0.0%)  |
| [40–50]                                | 78,708     | (0.2%)  | 0          | (0.0%)  | 0          | (0.0%)  | 0          | (0.0%)  |
| [50–60]                                | 0          | (0.0%)  | 0          | (0.0%)  | 0          | (0.0%)  | 0          | (0.0%)  |
| [60–70]                                | 0          | (0.0%)  | 0          | (0.0%)  | 0          | (0.0%)  | 0          | (0.0%)  |
| [70–80]                                | 0          | (0.0%)  | 0          | (0.0%)  | 0          | (0.0%)  | 0          | (0.0%)  |
| [80–90]                                | 0          | (0.0%)  | 0          | (0.0%)  | 0          | (0.0%)  | 0          | (0.0%)  |





**Table S6.** U.S. population size in numbers and percentages (rounded to the nearest decimal place) of people affected by wildfire pollution based on percentage of days with 24-hour moving average fire-PM<sub>2.5</sub> above five PM<sub>2.5</sub> concentration thresholds between May-September for four individual years (2013-2016). The lowest percentage used is 1% and the 1-day frequency corresponds to 0.65% in a 5-month period.

| % of days                              | >1 µg/m³    |         | >5 µg/m³    |         | >10 µg/m³   |         | >28 µg/m³   |         |
|----------------------------------------|-------------|---------|-------------|---------|-------------|---------|-------------|---------|
| Seasonal Exceedances (population) 2013 |             |         |             |         |             |         |             |         |
| [0–1]                                  | 7,916,845   | (2.6%)  | 195,134,634 | (63.8%) | 253,260,524 | (82.8%) | 287,939,405 | (94.2%) |
| [1–10]                                 | 46,704,662  | (15.3%) | 100,587,839 | (32.9%) | 49,567,388  | (16.2%) | 17,168,723  | (5.6%)  |
| [10–20]                                | 105,226,072 | (34.4%) | 7,382,717   | (2.4%)  | 2,805,174   | (0.9%)  | 623,775     | (0.2%)  |
| [20–30]                                | 102,908,407 | (33.7%) | 2,593,554   | (0.8%)  | 110,866     | (0.0%)  | 12,381      | (0.0%)  |
| [30–40]                                | 36,617,230  | (12.0%) | 44,107      | (0.0%)  | 0           | (0.0%)  | 0           | (0.0%)  |
| [40–50]                                | 6,172,874   | (2.0%)  | 1101        | (0.0%)  | 333         | (0.0%)  | 0           | (0.0%)  |
| [50–60]                                | 196,345     | (0.1%)  | 333         | (0.0%)  | 0           | (0.0%)  | 0           | (0.0%)  |
| [60–70]                                | 1517        | (0.0%)  | 0           | (0.0%)  | 0           | (0.0%)  | 0           | (0.0%)  |
| [70–80]                                | 333         | (0.0%)  | 0           | (0.0%)  | 0           | (0.0%)  | 0           | (0.0%)  |
| [80–90]                                | 0           | (0.0%)  | 0           | (0.0%)  | 0           | (0.0%)  | 0           | (0.0%)  |
| Seasonal Exceedances (population) 2014 |             |         |             |         |             |         |             |         |
| [0–1]                                  | 1,912,326   | (0.6%)  | 222,926,096 | (72.9%) | 245,709,853 | (80.4%) | 285,097,403 | (93.2%) |
| [1–10]                                 | 123,611,407 | (40.4%) | 51,800,339  | (16.9%) | 50,233,796  | (16.4%) | 20,311,201  | (6.6%)  |
| [10–20]                                | 100,944,641 | (33.0%) | 24,866,259  | (8.1%)  | 9,475,378   | (3.1%)  | 311,914     | (0.1%)  |
| [20–30]                                | 38,554,325  | (12.6%) | 5,661,490   | (1.9%)  | 307,357     | (0.1%)  | 21,216      | (0.0%)  |
| [30–40]                                | 33,905,817  | (11.1%) | 489,435     | (0.2%)  | 17,900      | (0.0%)  | 2551        | (0.0%)  |
| [40–50]                                | 5,369,938   | (1.8%)  | 333         | (0.0%)  | 0           | (0.0%)  | 0           | (0.0%)  |
| [50–60]                                | 1,443,725   | (0.5%)  | 0           | (0.0%)  | 0           | (0.0%)  | 0           | (0.0%)  |
| [60–70]                                | 1157        | (0.0%)  | 333         | (0.0%)  | 0           | (0.0%)  | 0           | (0.0%)  |
| [70–80]                                | 616         | (0.0%)  | 0           | (0.0%)  | 0           | (0.0%)  | 0           | (0.0%)  |
| [80–90]                                | 333         | (0.0%)  | 0           | (0.0%)  | 0           | (0.0%)  | 0           | (0.0%)  |
| Seasonal Exceedances (population) 2015 |             |         |             |         |             |         |             |         |
| [0–1]                                  | 6,902,989   | (2.3%)  | 123,377,072 | (40.4%) | 231,511,051 | (75.7%) | 291,556,926 | (95.4%) |
| [1–10]                                 | 111,965,261 | (36.6%) | 172,907,954 | (56.6%) | 70,991,662  | (23.2%) | 13,366,344  | (4.4%)  |
| [10–20]                                | 139,767,952 | (45.7%) | 7,861,300   | (2.6%)  | 3,005,440   | (1.0%)  | 805,549     | (0.3%)  |
| [20–30]                                | 37,264,427  | (12.2%) | 1,573,918   | (0.5%)  | 235,494     | (0.1%)  | 15,465      | (0.0%)  |
| [30–40]                                | 8,774,610   | (2.9%)  | 24,041      | (0.0%)  | 638         | (0.0%)  | 0           | (0.0%)  |
| [40–50]                                | 1,068,548   | (0.3%)  | 0           | (0.0%)  | 0           | (0.0%)  | 0           | (0.0%)  |
| [50–60]                                | 498         | (0.0%)  | 0           | (0.0%)  | 0           | (0.0%)  | 0           | (0.0%)  |
| [60–70]                                | 0           | (0.0%)  | 0           | (0.0%)  | 0           | (0.0%)  | 0           | (0.0%)  |
| [70–80]                                | 0           | (0.0%)  | 0           | (0.0%)  | 0           | (0.0%)  | 0           | (0.0%)  |
| [80–90]                                | 0           | (0.0%)  | 0           | (0.0%)  | 0           | (0.0%)  | 0           | (0.0%)  |
| Seasonal Exceedances (population) 2016 |             |         |             |         |             |         |             |         |
| [0–1]                                  | 64,648,068  | (21.1%) | 219,895,549 | (71.9%) | 250,698,389 | (82.0%) | 279,283,510 | (91.3%) |
| [1–10]                                 | 173,636,706 | (56.8%) | 52,869,611  | (17.3%) | 44,113,851  | (14.4%) | 26,521,513  | (8.7%)  |
| [10–20]                                | 16,433,623  | (5.4%)  | 24,970,053  | (8.2%)  | 10,584,771  | (3.5%)  | 230,187     | (0.1%)  |
| [20–30]                                | 12,077,764  | (4.0%)  | 7,873,251   | (2.6%)  | 625,393     | (0.2%)  | 46,823      | (0.0%)  |
| [30–40]                                | 23,255,827  | (7.6%)  | 460,857     | (0.2%)  | 67,423      | (0.0%)  | 8609        | (0.0%)  |
| [40–50]                                | 15,966,674  | (5.2%)  | 20,655      | (0.0%)  | 814         | (0.0%)  | 0           | (0.0%)  |
| [50–60]                                | 67,996      | (0.0%)  | 333         | (0.0%)  | 0           | (0.0%)  | 0           | (0.0%)  |
| [60–70]                                | 1927        | (0.0%)  | 0           | (0.0%)  | 0           | (0.0%)  | 0           | (0.0%)  |
| [70–80]                                | 878         | (0.0%)  | 333         | (0.0%)  | 0           | (0.0%)  | 0           | (0.0%)  |
| [80–90]                                | 1178        | (0.0%)  | 0           | (0.0%)  | 0           | (0.0%)  | 0           | (0.0%)  |
